# Supplementary material for: Performance of the 2007 WHO Algorithm to Diagnose Smear-Negative Pulmonary Tuberculosis in a HIV Prevalent Setting
Source: PubMed Central journal article supplement (PMC3526594; doi:10.1371/journal.pone.0051336), 2012-12-19
Supplement: pone.0051336.s001.pdf [file pone.0051336.s001.pdf]

# CXR FINDING

Date of CXR: | | / | / | | | |  
 Day Month Year

| Quality of radiograph             |                  |                                                             |  |
|-----------------------------------|------------------|-------------------------------------------------------------|--|
| Good quality (No faults)          |                  | Not good but usable, reasons                                |  |
| Not good but usable (some faults) | - Too dark       | Cannot see peripheral vessels                               |  |
| Bad quality – not usable*         | - Too light      | Cannot see vertebral ends behind the heart                  |  |
|                                   | - Rotated        | Medial clavicles different distances from spinous process   |  |
|                                   | - Under-inspired | Less than 6 anterior ribs at diaphragm mid clavicular line  |  |
|                                   | - Parts cut off  | e.g. costophrenic angles                                    |  |
|                                   | - Artefacts seen | Dots, lines, metal, clothing that is not anatomy or disease |  |
|                                   | - Movement blur  | Like a moving photo – lose sharp edges of heart             |  |

\*Fill in a new CXR form

| Diagram example                                                                    | Record Distribution Zones                                                           |
|------------------------------------------------------------------------------------|-------------------------------------------------------------------------------------|
| <b>Granuloma Oval lesion</b>                                                       |                                                                                     |
| 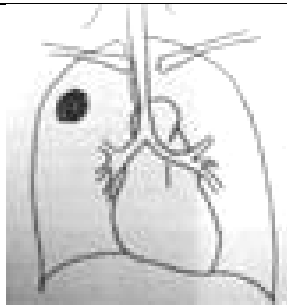  |   |
|                                                                                    | 1                                                                                   |
|                                                                                    | 2                                                                                   |
|                                                                                    | 3                                                                                   |
|                                                                                    | 4                                                                                   |
|                                                                                    | 5                                                                                   |
| <b>Cavitation (within a granuloma, consolidation or infiltrate)</b>                |                                                                                     |
|  |  |
|                                                                                    | 1                                                                                   |
|                                                                                    | 2                                                                                   |
|                                                                                    | 3                                                                                   |
|                                                                                    | 4                                                                                   |
|                                                                                    | 5                                                                                   |
| <b>Bronchopneumonic pattern, infiltration</b>                                      |                                                                                     |
|  |  |
|                                                                                    | 1                                                                                   |
|                                                                                    | 2                                                                                   |
|                                                                                    | 3                                                                                   |
|                                                                                    | 4                                                                                   |
|                                                                                    | 5                                                                                   |
| <b>Consolidation</b>                                                               |                                                                                     |
|  |  |
|                                                                                    | 1                                                                                   |
|                                                                                    | 2                                                                                   |
|                                                                                    | 3                                                                                   |
|                                                                                    | 4                                                                                   |
|                                                                                    | 5                                                                                   |

| Diagram example                                                                      | Record Distribution Zones                                                             |
|--------------------------------------------------------------------------------------|---------------------------------------------------------------------------------------|
| <b>Milliary Nodular pattern</b>                                                      |                                                                                       |
| 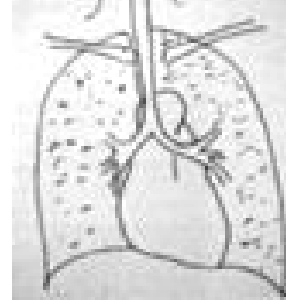  |   |
|                                                                                      | 1                                                                                     |
|                                                                                      | 2                                                                                     |
|                                                                                      | 3                                                                                     |
|                                                                                      | 4                                                                                     |
|                                                                                      | 5                                                                                     |
| <b>Pleural effusion</b>                                                              |                                                                                       |
|  |  |
|                                                                                      | 1                                                                                     |
|                                                                                      | 2                                                                                     |
|                                                                                      | 3                                                                                     |
|                                                                                      | 4                                                                                     |
|                                                                                      | 5                                                                                     |
| <b>Lymph-adenopathy</b>                                                              |                                                                                       |
|  |  |
|                                                                                      | 1                                                                                     |
|                                                                                      | 2                                                                                     |
|                                                                                      | 3                                                                                     |
|                                                                                      | 4                                                                                     |
|                                                                                      | 5                                                                                     |
| <b>Apical Fibrocystic Change Scarring and cysts</b>                                  |                                                                                       |
|  |  |
|                                                                                      | 1                                                                                     |
|                                                                                      | 2                                                                                     |
|                                                                                      |                                                                                       |
|                                                                                      |                                                                                       |
|                                                                                      |                                                                                       |

|                 |  |          |  |        |  |
|-----------------|--|----------|--|--------|--|
| Definitely TB   |  | Maybe TB |  | Not TB |  |
| Other diagnosis |  |          |  |        |  |
